# Supplementary material
Source: PubMed Central journal article supplement (PMC8792800)

## Supplementary Online Content

Han D, Lin A, Kuronuma K, et al. Association of plaque location and vessel geometry determined by coronary computed tomographic angiography with future acute coronary syndrome–causing culprit lesions. *JAMA Cardiol*. Published online January 26, 2022. doi:10.1001/jamacardio.2021.5705

**eTable 1.** Additional Patient Characteristics Between ACS vs Control

**eTable 2.** CCTA Lesion Characteristics According to the Number of AGCs in Patients With ACS

**eTable 3.** Univariable and Multivariable Cox Proportional Hazards Regression Analysis of AGCs for Risk of Culprit Lesions

**eTable 4.** Multivariable Cox Proportional Hazards Regression Analysis of AGCs for Risk of Culprit Lesions (Patients With ACS vs Controls)

**eTable 5.** Clinical and CCTA Characteristics in Analyzed (n = 116) and Excluded (n=118) Patients With ACS From the ICONIC Study

**eFigure 1.** Patient Selection and Study Design

**eFigure 2.** Illustrations of Adverse Geometric Characteristics

**eFigure 3.** Lesion Curve Assessment Using Semiautomated Software

**eFigure 4.** Propensity Score Distribution of the 116 Case and 116 Control Pairs

This supplementary material has been provided by the authors to give readers additional information about their work.

**eTable 1.** Additional Patient Characteristics Between ACS vs Control

|                                                                                                                                                                                                                                                                | ACS (n=116) | Controls (n=116) | <i>P</i> value |
|----------------------------------------------------------------------------------------------------------------------------------------------------------------------------------------------------------------------------------------------------------------|-------------|------------------|----------------|
| Angina type                                                                                                                                                                                                                                                    |             |                  | .03            |
| Asymptomatic                                                                                                                                                                                                                                                   | 19 (17.1)   | 36 (31.6)        |                |
| Noncardiac                                                                                                                                                                                                                                                     | 10 (9.0)    | 15 (13.2)        |                |
| Atypical                                                                                                                                                                                                                                                       | 51 (45.9)   | 42 (36.8)        |                |
| Typical                                                                                                                                                                                                                                                        | 31 (27.9)   | 21 (18.4)        |                |
| Dyspnea, %                                                                                                                                                                                                                                                     | 14 (14.6)   | 24 (25.8)        | .05            |
| Peripheral vascular disease                                                                                                                                                                                                                                    | 3 (3.6)     | 6 (7.3)          | .29            |
| Renal insufficiency                                                                                                                                                                                                                                            | 3 (3.1)     | 3 (3.4)          | .89            |
| Creatinine                                                                                                                                                                                                                                                     | 1.1 ± 0.5   | 1.0±0.3          | .68            |
| Race/Ethnicity                                                                                                                                                                                                                                                 |             |                  | .87            |
| White                                                                                                                                                                                                                                                          | 58 (64.4)   | 52 (61.2)        |                |
| East Asian                                                                                                                                                                                                                                                     | 27 (30.0)   | 27 (31.8)        |                |
| Others                                                                                                                                                                                                                                                         | 5 (5.6)     | 6 (7.1)          |                |
| Lipid profile                                                                                                                                                                                                                                                  |             |                  |                |
| Total Cholesterol                                                                                                                                                                                                                                              | 189.1±52.8  | 178.0±40.1       | .25            |
| Low-density Cholesterol                                                                                                                                                                                                                                        | 109.9±39.9  | 109.6±37.3       | .97            |
| High-density Cholesterol                                                                                                                                                                                                                                       | 47.0±13.2   | 47.1±12.9        | .98            |
| Medications                                                                                                                                                                                                                                                    |             |                  |                |
| Statin                                                                                                                                                                                                                                                         | 49 (42.2)   | 46 (39.7)        | .69            |
| Aspirin                                                                                                                                                                                                                                                        | 49 (42.2)   | 42 (36.2)        | .31            |
| ACEi/ARB                                                                                                                                                                                                                                                       | 29 (25.0)   | 27 (23.3)        | .79            |
| Beta blocker                                                                                                                                                                                                                                                   | 33 (28.4)   | 34 (29.3)        | .82            |
| Nitrates                                                                                                                                                                                                                                                       | 2 (1.7)     | 2 (1.7)          | .97            |
| Interval coronary revascularization                                                                                                                                                                                                                            | 70 (60.3)   | 32 (27.6)        | <.001          |
| Values are shown as mean ± standard deviation, median (interquartile range) or number (percentage).<br>CAD, coronary artery disease; ACS, acute coronary syndrome; ACEi, Angiotensin-converting enzyme (ACE) inhibitors; ARB, Angiotensin II Receptor Blockers |             |                  |                |

**eTable 2.** CCTA Lesion Characteristics According to the Number of AGCs in Patients With ACS

|                                                                                                                                                                                                  | AGC 0 (n=151)    | AGC 1 (n=262)    | AGC ≥2 (n=135)    | P Value |
|--------------------------------------------------------------------------------------------------------------------------------------------------------------------------------------------------|------------------|------------------|-------------------|---------|
| <b>Stenosis grade, n (%)</b>                                                                                                                                                                     |                  |                  |                   |         |
| Diameter stenosis                                                                                                                                                                                |                  |                  |                   | .07     |
| 1-24%                                                                                                                                                                                            | 60 (39.7)        | 92 (35.1)        | 30 (22.2)         |         |
| 25-49%                                                                                                                                                                                           | 56 (37.1)        | 101 (38.6)       | 59 (43.7)         |         |
| 50-69%                                                                                                                                                                                           | 23 (15.2)        | 44 (16.8)        | 28 (20.7)         |         |
| >70%                                                                                                                                                                                             | 12 (7.9)         | 25 (9.5)         | 18 (13.3)         |         |
| <b>Adverse plaque characteristics, n(%)</b>                                                                                                                                                      |                  |                  |                   |         |
| Positive remodeling                                                                                                                                                                              | 117 (77.5)       | 215 (82.1)       | 109 (81.3)        | .51     |
| Low attenuation plaque                                                                                                                                                                           | 13 (8.6)         | 46 (17.5)        | 29 (21.6)         | .008    |
| Spotty calcification                                                                                                                                                                             | 16 (10.6)        | 43 (16.4)        | 20 (14.9)         | .27     |
| Napkin-ring sign                                                                                                                                                                                 | 0 (0.0)          | 9 (3.4)          | 11 (8.2)          | .001    |
| <b>Quantitative plaque volume and burden</b>                                                                                                                                                     |                  |                  |                   |         |
| Total plaque volume, mm <sup>3</sup>                                                                                                                                                             | 15.5 (6.9-30.8)  | 31.4 (12.3-91.6) | 88.3 (26.2-154.9) | <.001   |
| Calcified                                                                                                                                                                                        | 3.8 (0.7-8.7)    | 7.2 (1.3-26.3)   | 21.7 (6.2-61.6)   | <.001   |
| Fibrous                                                                                                                                                                                          | 7.3 (3.1-16.4)   | 14.4 (5.3-42.4)  | 31.0 (11.1-70.6)  | <.001   |
| Fibro-fatty                                                                                                                                                                                      | 0.9 (0.1-4.6)    | 2.4 (0.2-13.8)   | 7.0 (0.7-20.6)    | .001    |
| Necrotic core                                                                                                                                                                                    | 0 (0-0.1)        | 0 (0-0.5)        | 0.1 (0-0.8)       | .02     |
| Noncalcified                                                                                                                                                                                     | 9.6 (4.1-22.4)   | 19.7 (6.4-60.1)  | 40.0 (14.6-89.1)  | <.001   |
| Total plaque burden, %                                                                                                                                                                           | 18.5 (10.8-27.4) | 20.9 (12.1-32.3) | 30.6 (19.3-39.3)  | <.001   |
| Calcified                                                                                                                                                                                        | 4.1 (0.8-8.6)    | 5.5 (1.6-11.7)   | 10.9 (3.8-17.9)   | <.001   |
| Fibrous                                                                                                                                                                                          | 8.6 (5.4-13.5)   | 9.7 (5.7-15.1)   | 12.2 (6.9-18.8)   | <.001   |
| Fibro-fatty                                                                                                                                                                                      | 0.8 (0.1-3.9)    | 1.6 (0.2-5.1)    | 2.5 (0.4-6.3)     | .011    |
| Necrotic core                                                                                                                                                                                    | 0 (0-0.1)        | 0 (0-0.2)        | 0.01 (0-0.3)      | .006    |
| Noncalcified plaque                                                                                                                                                                              | 10.7 (5.9-18.0)  | 12.3 (7.0-22.8)  | 17.0 (9.1-25.9)   | .003    |
| Values are shown as median (interquartile range) or number (percentage).<br>CCTA, coronary computed tomography angiography; AGC, adverse geometric characteristics; ACS, acute coronary syndrome |                  |                  |                   |         |

**eTable 3.** Univariable and Multivariable Cox Proportional Hazards Regression Analysis of AGCs for Risk of Culprit Lesions

|                                                                                                                                                                                                                                                                                                     | Univariable   |            |                | Multivariable* |            |                |
|-----------------------------------------------------------------------------------------------------------------------------------------------------------------------------------------------------------------------------------------------------------------------------------------------------|---------------|------------|----------------|----------------|------------|----------------|
|                                                                                                                                                                                                                                                                                                     | HR            | 95% CI     | <i>P</i> Value | HR             | 95% CI     | <i>P</i> Value |
| Bifurcation                                                                                                                                                                                                                                                                                         | 3.61          | 2.33-5.59  | <.001          | 2.14           | 1.39-3.29  | <.001          |
| Tortuosity                                                                                                                                                                                                                                                                                          | 4.70          | 1.50-14.77 | .008           | 2.31           | 1.01-5.27  | .04            |
| Short distance from ostium                                                                                                                                                                                                                                                                          | 2.06          | 1.37-3.08  | <.001          | 2.71           | 1.73-4.24  | <.001          |
| Number of AGCs                                                                                                                                                                                                                                                                                      |               |            |                |                |            |                |
| 0                                                                                                                                                                                                                                                                                                   | 1 (Reference) |            |                | 1 (Reference)  |            |                |
| 1                                                                                                                                                                                                                                                                                                   | 3.05          | 1.50-6.14  | .002           | 2.90           | 1.38-6.08  | .005           |
| ≥2                                                                                                                                                                                                                                                                                                  | 7.82          | 3.89-15.75 | <.001          | 6.84           | 3.33-14.04 | <.001          |
| * adjusted for diameter stenosis grade, number of adverse plaque characteristics, plaque area at the maximal stenosis section, minimum lumen area, total plaque, noncalcified plaque, and necrotic core volume AGCs, adverse geometrical characteristics; HR, hazard ratio; CI, confidence interval |               |            |                |                |            |                |

**eTable 4.** Multivariable Cox Proportional Hazards Regression Analysis of AGCs for Risk of Culprit Lesions (Patients With ACS vs Controls)

|                                                                                                                                                                                                                                                                                                     | Univariable   |            |                | Multivariable* |           |                |
|-----------------------------------------------------------------------------------------------------------------------------------------------------------------------------------------------------------------------------------------------------------------------------------------------------|---------------|------------|----------------|----------------|-----------|----------------|
|                                                                                                                                                                                                                                                                                                     | HR            | 95% CI     | <i>P</i> value | HR             | 95% CI    | <i>P</i> value |
| Bifurcation                                                                                                                                                                                                                                                                                         | 3.61          | 2.55-5.09  | <.001          | 2.63           | 1.77-3.92 | <.001          |
| Tortuosity                                                                                                                                                                                                                                                                                          | 1.73          | 0.73-4.10  | .21            | 1.66           | 0.73-3.78 | .22            |
| Short ostium to lesion distance                                                                                                                                                                                                                                                                     | 2.17          | 1.47-3.19  | <.001          | 1.55           | 1.02-2.33 | .03            |
| Number of AGCs                                                                                                                                                                                                                                                                                      |               |            |                |                |           |                |
| 0                                                                                                                                                                                                                                                                                                   | 1 (Reference) |            |                | 1 (Reference)  |           |                |
| 1                                                                                                                                                                                                                                                                                                   | 4.96          | 2.33-10.58 | <.001          | 2.53           | 1.24-5.15 | .01            |
| ≥2                                                                                                                                                                                                                                                                                                  | 9.70          | 4.69-20.08 | <.001          | 4.43           | 2.17-9.05 | <.001          |
| * adjusted for diameter stenosis grade, number of adverse plaque characteristics, plaque area at the maximal stenosis section, minimum lumen area, total plaque, noncalcified plaque, and necrotic core volume AGCs, adverse geometrical characteristics; HR, hazard ratio; CI, confidence interval |               |            |                |                |           |                |

**eTable 5.** Clinical and CCTA Characteristics in Analyzed (n = 116) and Excluded (n=118) Patients With ACS From the ICONIC Study

|                                 | Analyzed (n=116) | Excluded (n=118) | <i>P</i> Value |
|---------------------------------|------------------|------------------|----------------|
| Age                             | 62.7 ± 11.5      | 61.7 ± 11.6      | .49            |
| Male                            | 80 (68.9)        | 69 (58.5)        | .10            |
| Body mass index                 | 27.3 ± 4.5       | 27.8 ± 5.6       | .45            |
| Hypertension                    | 72 (62.1)        | 76 (65.5)        | .59            |
| Diabetes                        | 26 (22.4)        | 20 (16.9)        | .29            |
| Dyslipidemia                    | 67 (58.3)        | 62 (52.9)        | .42            |
| Family history of premature CAD | 49 (43.4)        | 45 (39.1)        | .52            |
| Current smoker                  | 29 (25.2)        | 43 (36.4)        | .06            |
| Type of ACS event               |                  |                  |                |
| STEMI                           | 21 (18.1)        | 19 (16.1)        | .68            |
| NSTEMI                          | 50 (43.1)        | 64 (54.2)        | .09            |
| MI, unspecified                 | 3 (2.6)          | 3 (2.5)          | .98            |
| Unstable angina                 | 42 (36.2)        | 32 (27.1)        | .14            |
| Angina type                     |                  |                  | .39            |
| Asymptomatic                    | 19 (17.1)        | 18 (16.2)        |                |
| Noncardiac                      | 10 (9.0)         | 18 (16.2)        |                |
| Atypical                        | 51 (45.9)        | 43 (38.7)        |                |
| Typical                         | 31 (27.9)        | 32 (28.8)        |                |
| Dyspnea, %                      | 14 (14.6)        | 26 (29.9)        | .01            |
| Race/Ethnicity                  |                  |                  | .80            |
| White                           | 58 (64.4)        | 54 (62.1)        |                |
| East Asian                      | 27 (30.0)        | 26 (29.9)        |                |
| Others                          | 5 (5.6)          | 7 (8.1)          |                |
| Lipid profile                   |                  |                  |                |
| Total Cholesterol               | 189.1±52.8       | 198.3±41.7       | .30            |
| Low-density Cholesterol         | 109.9±39.9       | 128.2±42.2       | .03            |
| High-density Cholesterol        | 47.0±13.2        | 49.1±14.2        | .44            |
| Medications                     |                  |                  |                |

|                                      |                     |                    |       |
|--------------------------------------|---------------------|--------------------|-------|
| Statin                               | 49 (42.2)           | 47 (39.8)          | .29   |
| Aspirin                              | 49 (42.2)           | 43 (36.4)          | .10   |
| ACE/ARB                              | 29 (25.0)           | 37 (31.4)          | .28   |
| Beta blocker                         | 33 (28.4)           | 30 (25.4)          | .35   |
| Nitrates                             | 2 (1.7)             | 9 (7.6)            | .07   |
| Interval coronary revascularization  | 70 (60.3)           | 48 (40.7)          | .003  |
| CCTA characteristics                 |                     |                    |       |
| CAD severity                         |                     |                    | <.001 |
| Normal                               | 0 (0)               | 15 (12.7)          |       |
| Nonobstructive                       | 49 (42.2)           | 55 (46.6)          |       |
| 1-vessel obstructive                 | 40 (34.5)           | 29 (24.6)          |       |
| 2-vessel obstructive                 | 12 (10.3)           | 13 (11.0)          |       |
| 3-vessel/left main                   | 15 (12.9)           | 6 (5.1)            |       |
| Diameter stenosis, %                 | 45.4±15.9           | 31.1±18.9          | <.001 |
| Area stenosis, %                     | 67.6±18.0           | 48.9±26.6          | <.001 |
| Total plaque volume, mm <sup>3</sup> | 296.1 (118.3-480.7) | 109.9 (32.4-331.3) | <.001 |
| Calcified                            | 73.5 (21.4-181.0)   | 18.8 (0.1-84.5)    | <.001 |
| Fibrous                              | 131.8 (57.2-200.6)  | 56.2 (13.6-137.1)  | <.001 |
| Fibro-fatty                          | 32.7 (12.2-82.7)    | 15.8 (1.3-67.4)    | .003  |
| Necrotic core                        | 2.0 (0.1-7.3)       | 0.8 (0-3.7)        | .02   |
| Noncalcified                         | 1880.4 (73.3-306.9) | 80.0 (22.7-214.6)  | <.001 |
| Total plaque burden, %               | 11.1 (5.7-19.6)     | 5.8 (1.6-15.5)     | <.002 |
| Calcified burden                     | 3.7 (0.8-6.9)       | 0.8 (0.1-4.0)      | <.001 |
| Fibrous burden                       | 5.2 (2.5-9.1)       | 2.7 (0.8-6.9)      | <.001 |
| Fibro-fatty burden                   | 1.5 (0.5-3.4)       | 0.8 (0.1-3.0)      | .01   |
| Necrotic core burden                 | 0.1 (0-0.3)         | 0.1 (0-0.2)        | .04   |
| Noncalcified plaque burden           | 7.4 (3.3-12.6)      | 4.0 (1.1-10.5)     | <.001 |
| Max cross-sectional plaque burden, % | 70.8±16.6           | 55.6±26.9          | <.001 |
| Diffuseness, %                       | 31.6±19.4           | 20.0±17.7          | <.001 |
| Number of total lesions              | 4.7 ± 2.4           | 2.9±2.2            | <.001 |

Values are shown as mean  $\pm$  standard deviation, median (interquartile range) or number (percentage).

CAD, coronary artery disease; ACS, acute coronary syndrome; STEMI, ST elevation myocardial infarction; NSTEMI, Non-ST-elevation myocardial infarction



**eFigure 1. Patient Selection and Study Design**

Flow chart showing inclusion and exclusion criteria for the study population. ACS = acute coronary syndrome; CCTA = coronary computed tomography angiography; MACE = major adverse cardiovascular events.

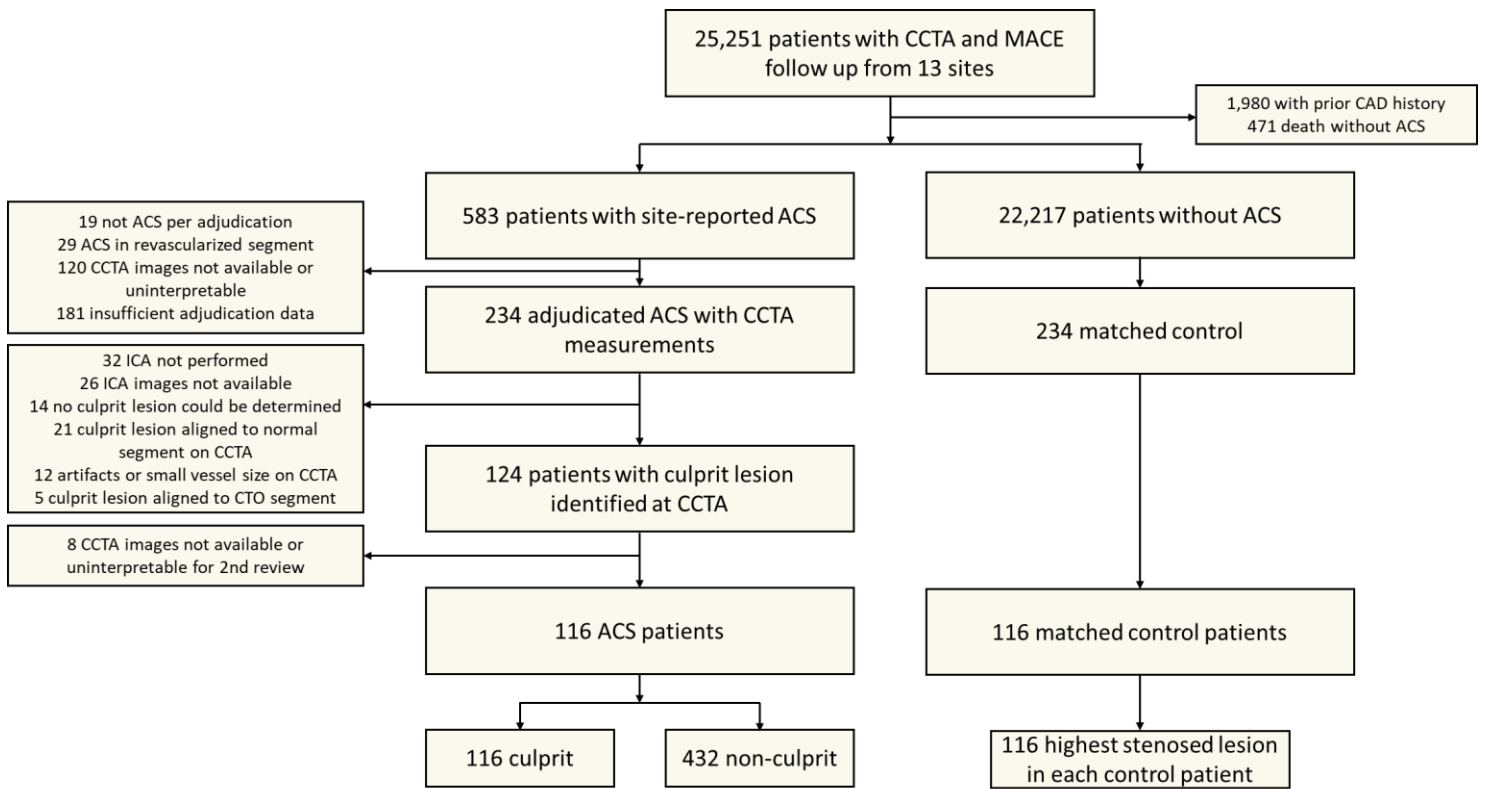

## eFigure 2. Illustrations of Adverse Geometric Characteristics

Distance from ostium to lesion, lesion location at bifurcation or trifurcation, and vessel tortuosity were assessed as adverse geometric characteristics (AGCs) for individual plaques in patients with subsequent acute coronary syndrome. Red overlay depicts noncalcified plaque.

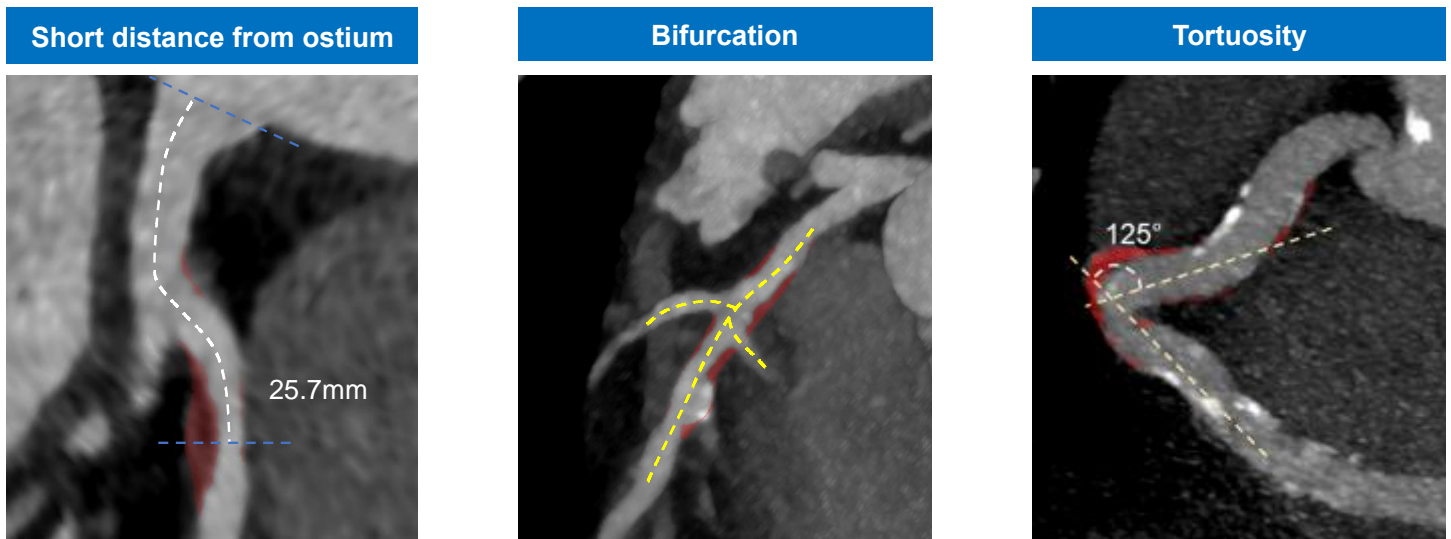

**eFigure 3. Lesion Curve Assessment Using Semiautomated Software**

Straitened MRP showed a coronary atherosclerotic plaque in the distal LAD. 3D reconstruction image represents the plaque was located at tortuous coronary segment. Vessel curvatures on the lesion were assessed at MPR image at each curve. Red and yellow overlay depict noncalcified and calcified plaque, respectively.

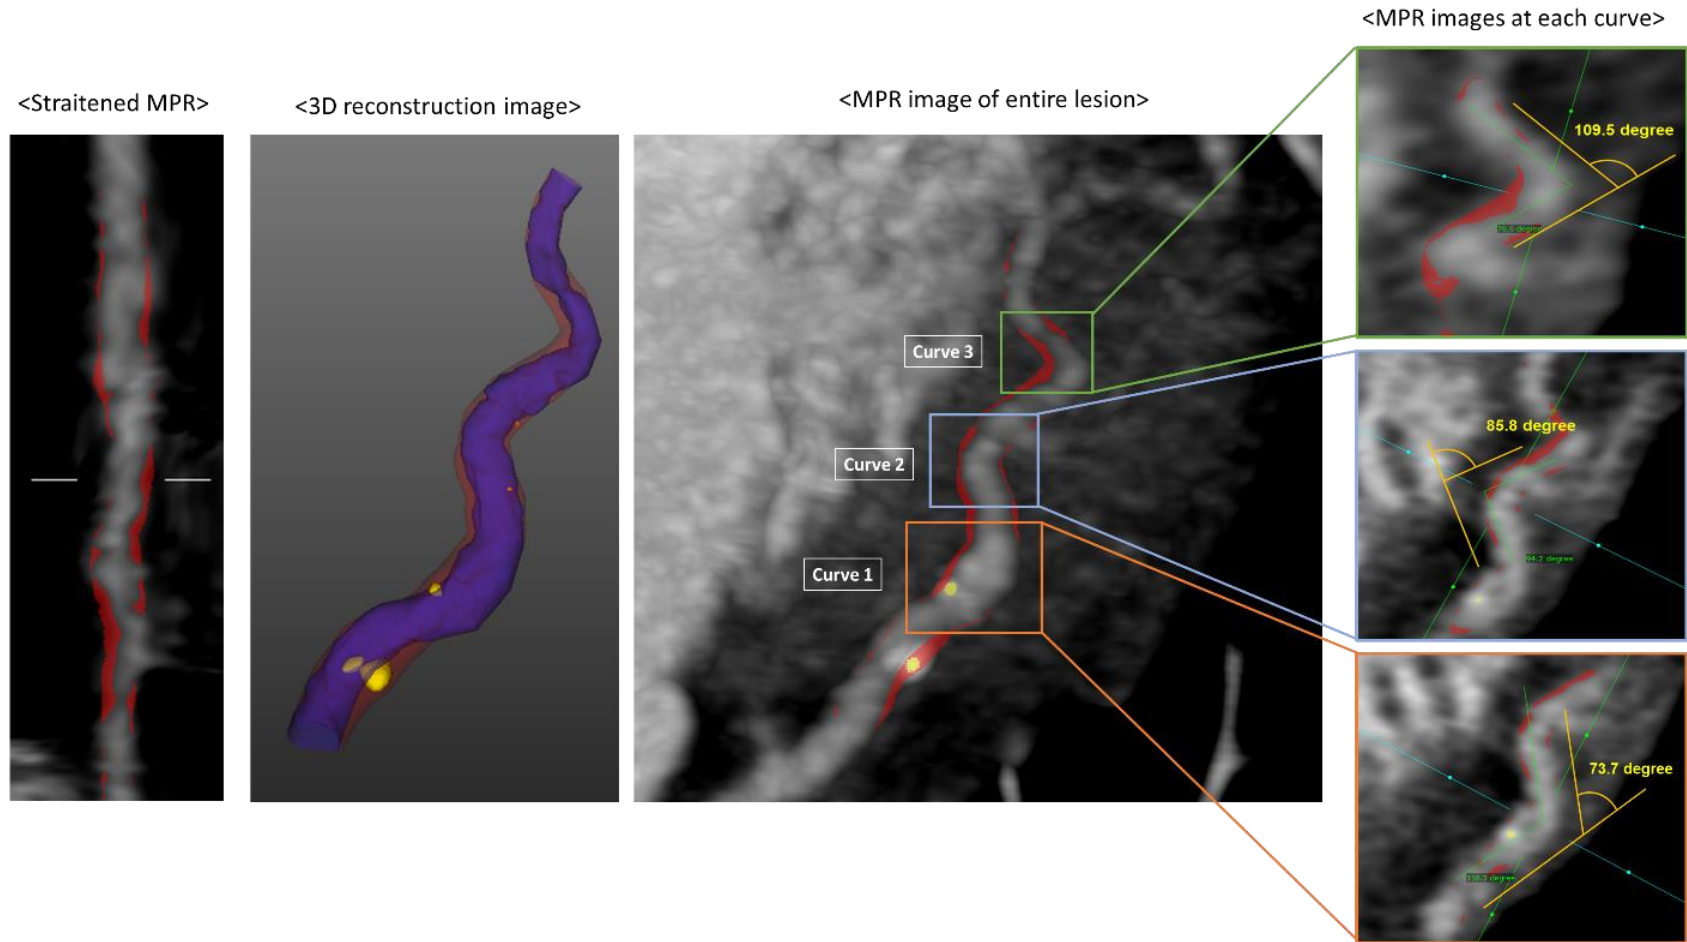

**eFigure 4.** Propensity Score Distribution of the 116 Case and 116 Control Pairs

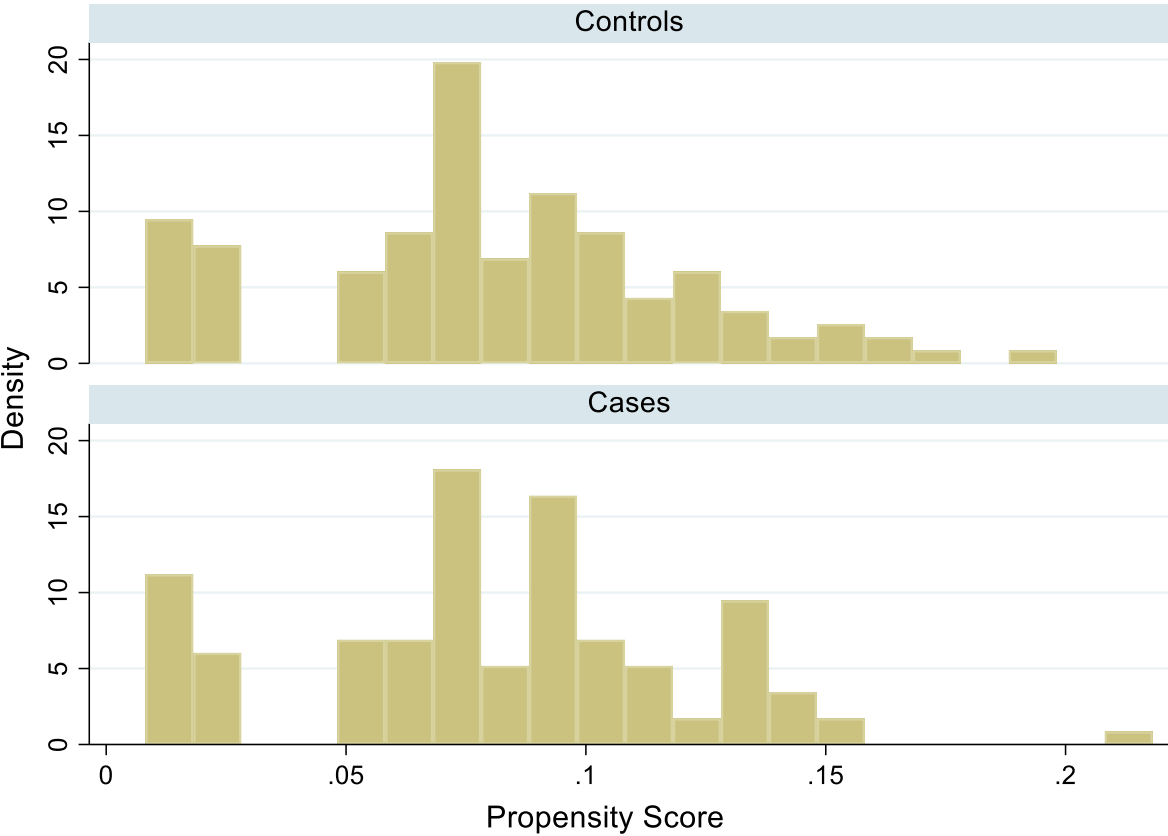

Supplement: jamacardiol-e215705-s001.pdf [file jamacardiol-e215705-s001.pdf]
